# Supplementary material for: Human pluripotent stem cell-derived kidney organoids for personalized congenital and idiopathic nephrotic syndrome modeling
Source: PubMed Central journal article supplement (PMC9148570; doi:10.1242/dev.200198), 2022-05-06
Supplement: develop-149-200198-s1.pdf [file develop-149-200198-s1.pdf]

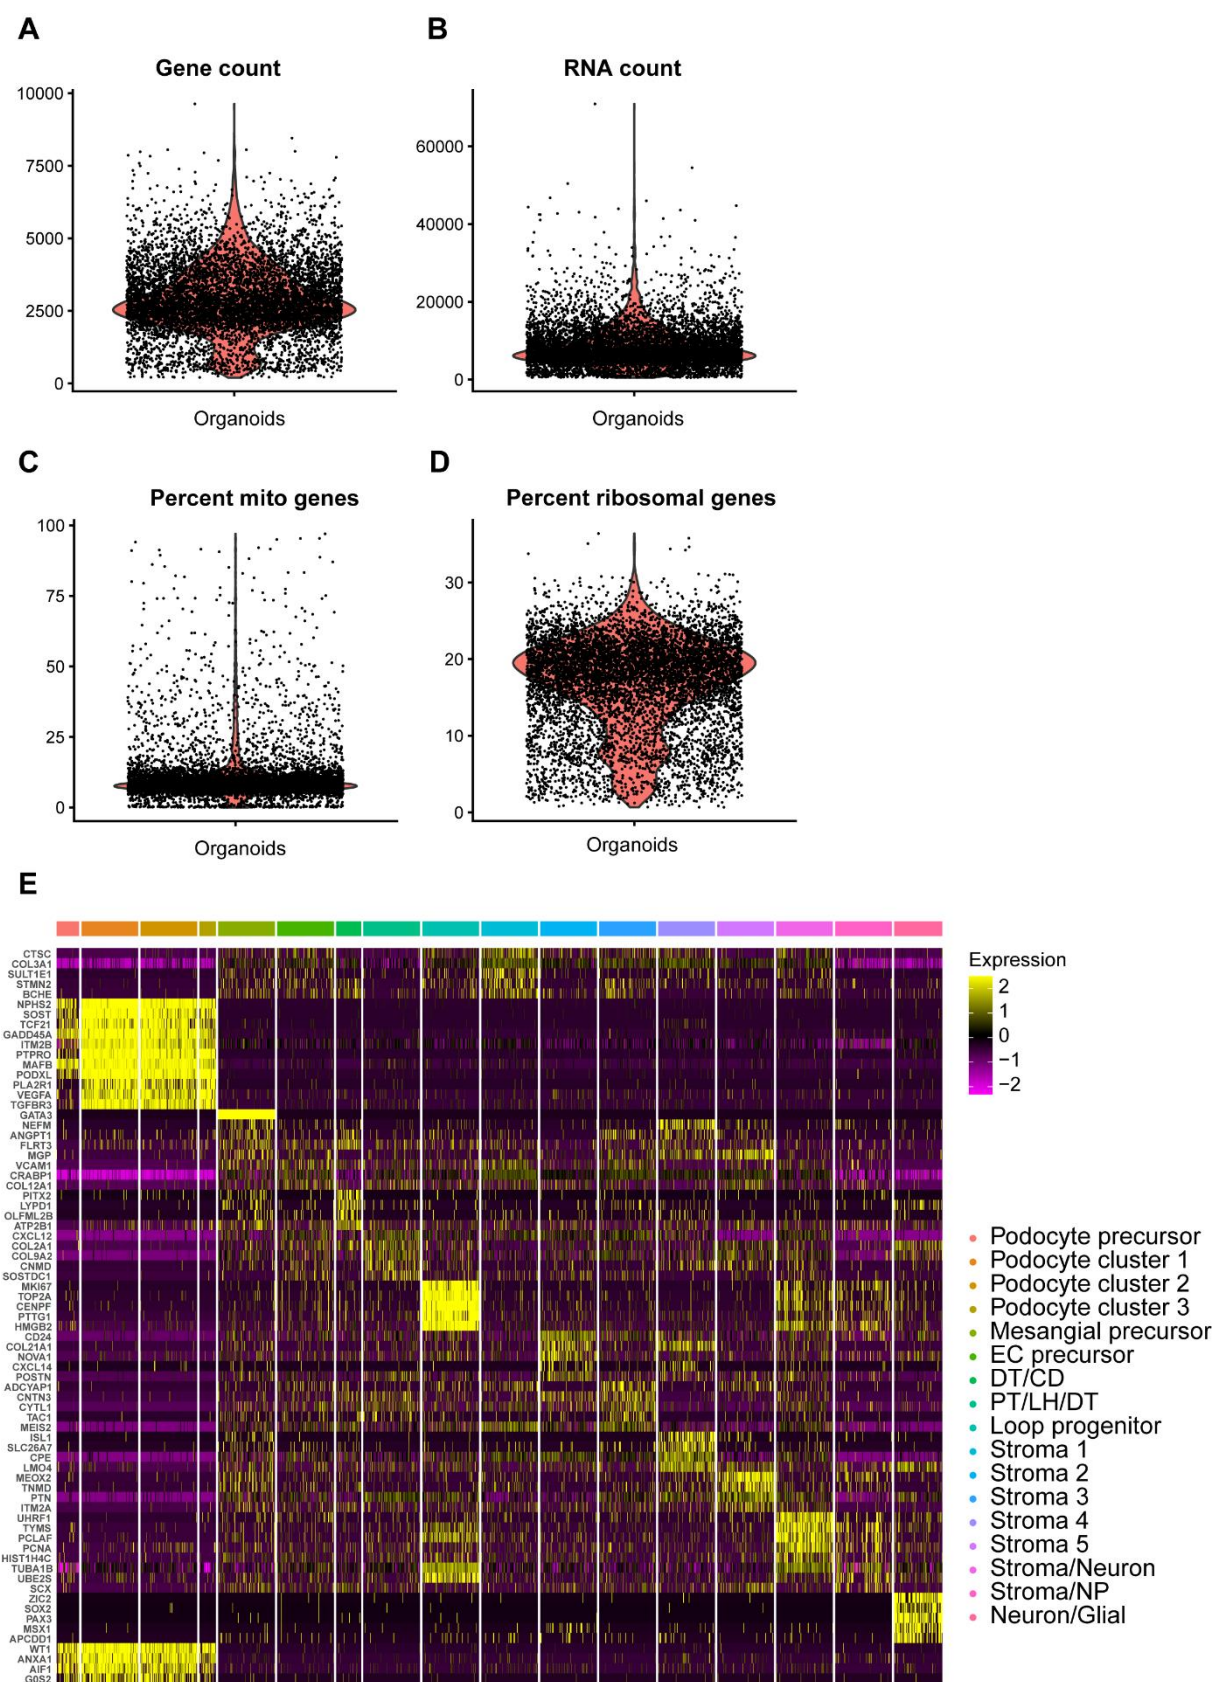

**Fig. S1. Related to figure 1. Quality control data of scRNA seq data.** (A) Number of genes, (B) total number of RNA molecules, percentage of (C) mitochondrial and (D) ribosomal genes in the organoids sample. (E) Heatmap showing a selection of 5 out of the top 20 differentially expressed (DE) genes per cluster. The full list of the top 20 DE genes per cluster is available in Supplemental Table S1. PT: proximal tubule, LH: loop of Henle, DT: distal tubule, CD: collecting duct, EC: endothelial cells.

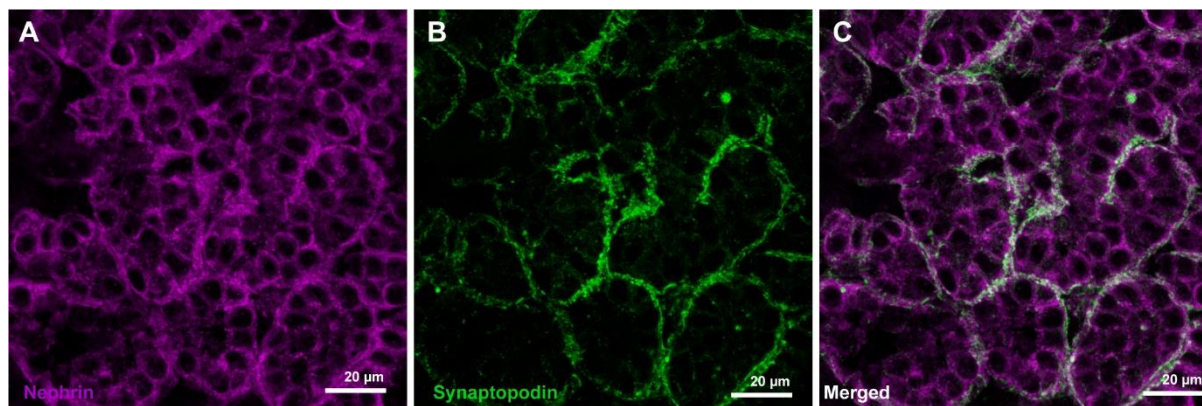

**Fig. S2. Related to figure 1. Protein expression and localization of specific podocyte markers in kidney organoids.** (A) Nephryn (magenta) and (B) synaptopodin (green) expression in organoid podocytes (C, merged).

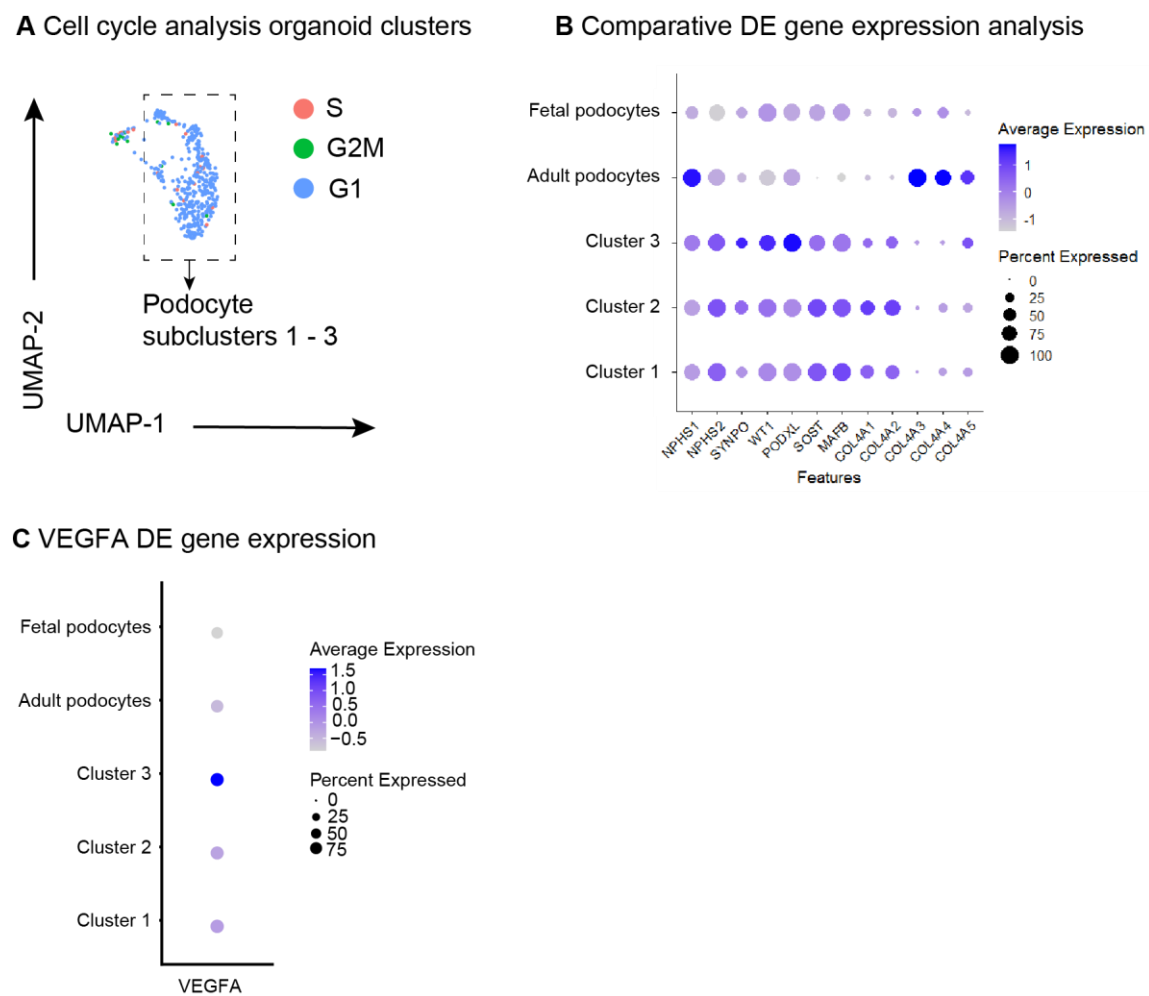

**Fig. S3. Related to figure 2. Cell cycle analysis of the podocyte sub-clusters, comparative DE marker genes and comparative VEGFA expression of organoid podocyte sub-clusters, human fetal and adult podocytes. DE: differentially expressed.**

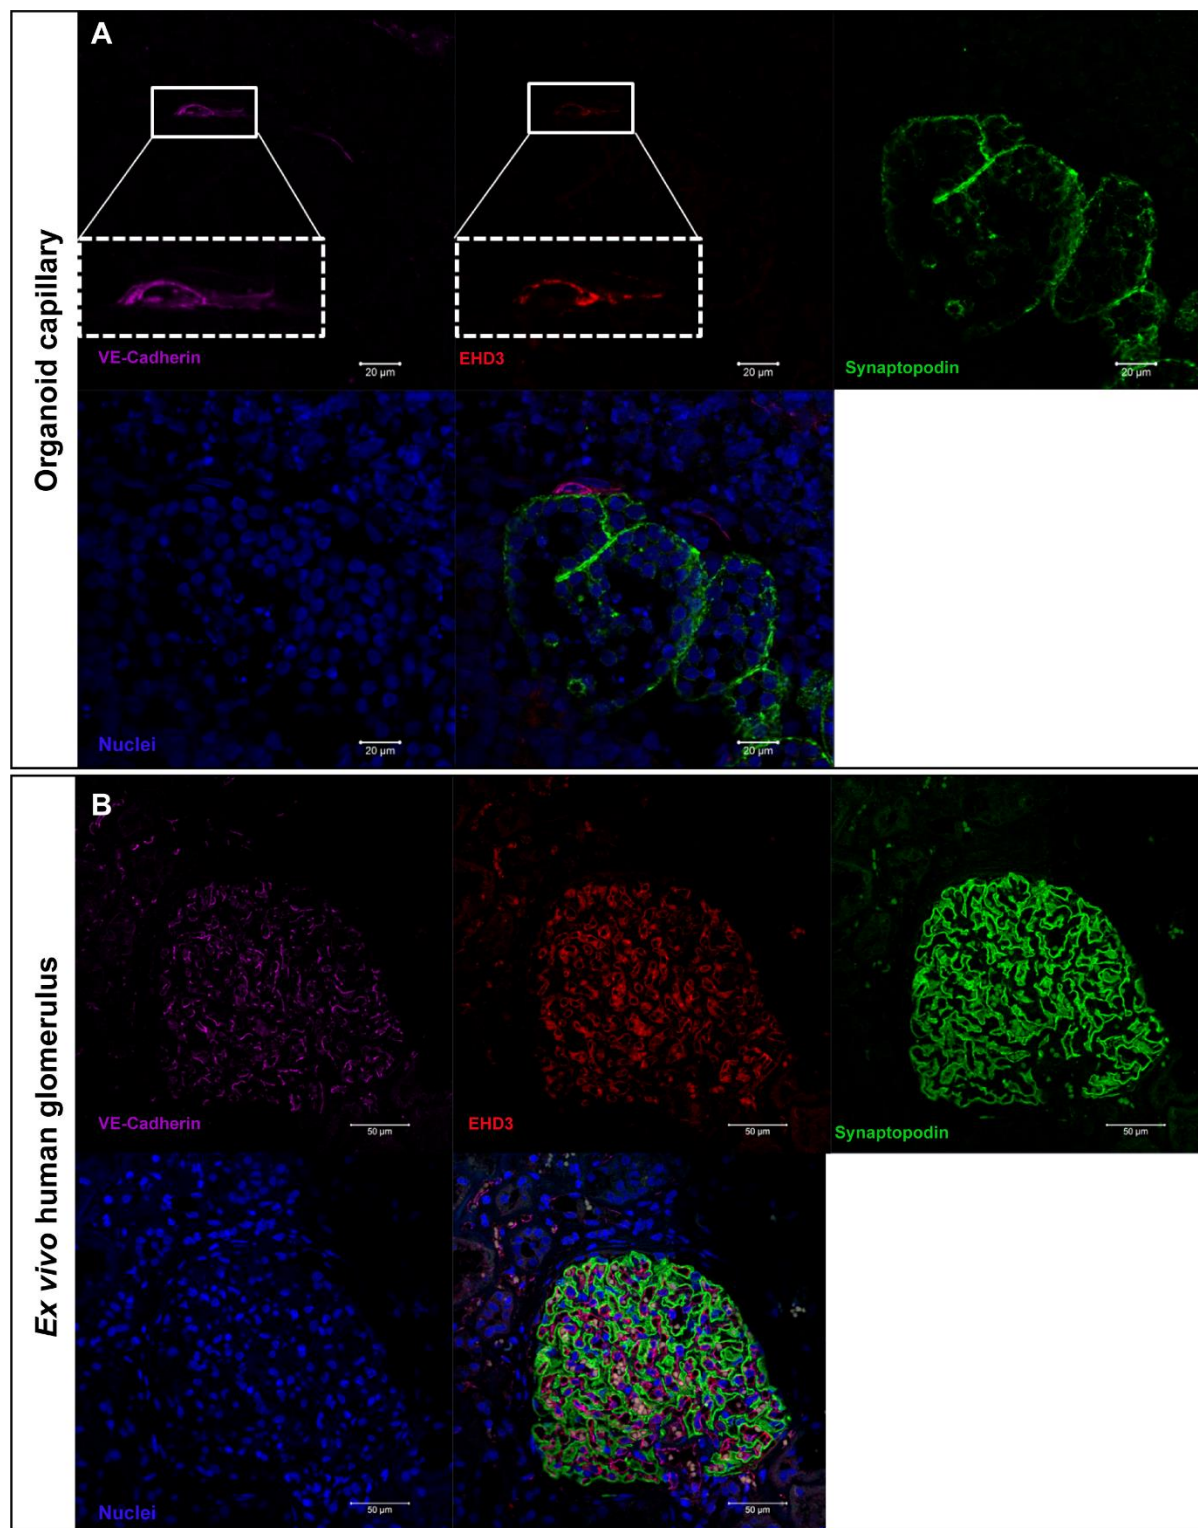

**Fig. S4. Related to figure 2. Glomerular endothelial EHD3 expression in organoids and in human glomeruli.** (A) VE-cadherin (magenta) and EHD3 (red) expression co-localized in an endothelial capillary in a kidney organoid, adjacent to synaptopodin expressing (green) podocytes. (B) VE-cadherin (magenta) and Eps15 Homology Domain-containing 3 (EHD3, red) expression co-localized in glomerular endothelium EHD3, in close proximity to podocytes as shown by synaptopodin expression.

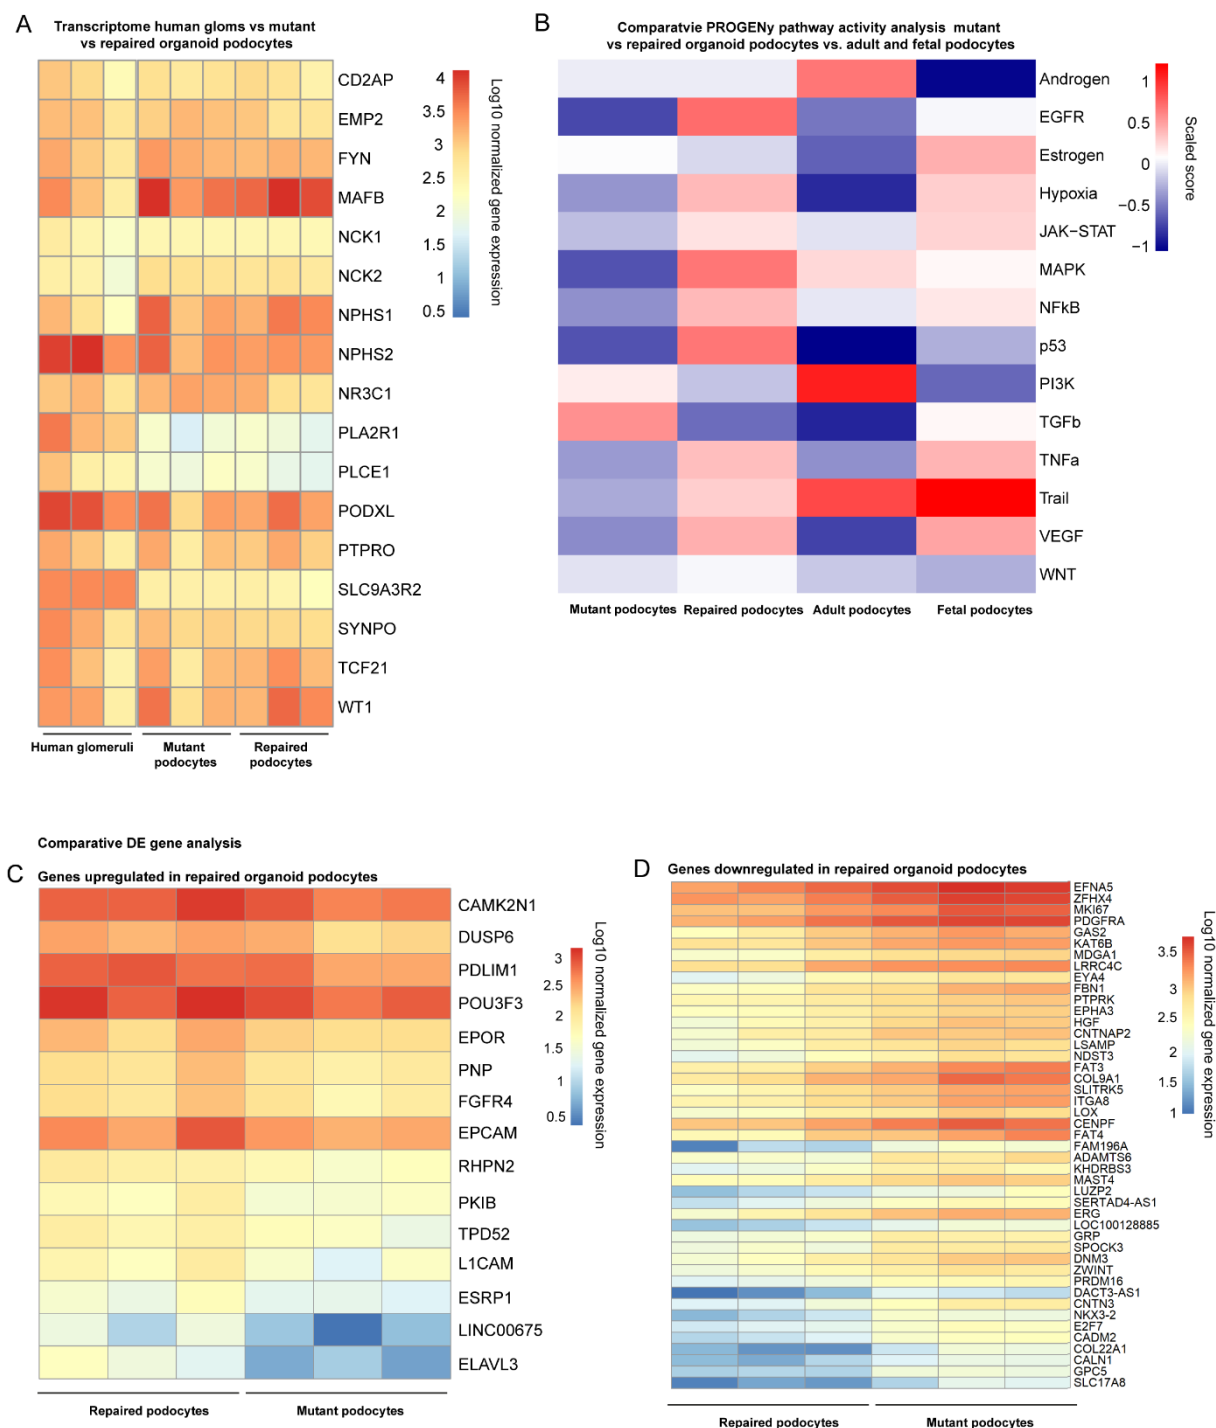

**Fig. S5. Related to figure 4. Comparative RNA sequencing analysis of kidney organoid *NPHS2* mutant podocytes, repaired organoid podocytes and normal human glomeruli-derived podocytes. (A)** Comparative bulk transcriptomics of podocyte specific genes in mutant and repaired organoid podocytes versus isolated human glomeruli. **(B)** Comparative PROGENy pathway activity analysis mutant and repaired organoid podocytes versus adult and fetal podocytes. Heatmap showing the enriched up- **(C)** and downregulated **(D)** genes in *NPHS2*-repaired organoid-derived podocytes compared to mutant organoid-derived podocytes.

Comparative MSigDb C2 analysis - reactomes enriched in repaired organoid podocytes

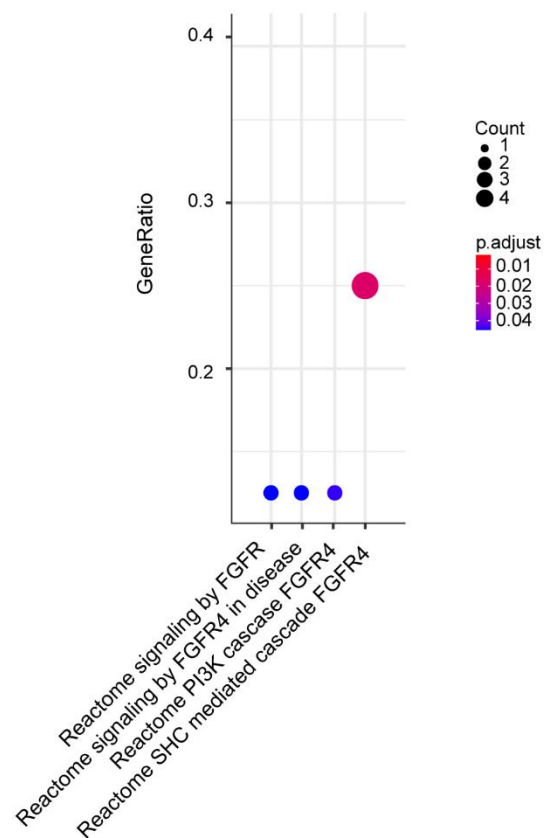

**Fig. S6. Related to figure 4. Comparative Molecular Signature database Analysis C2 showing enhanced FGFR reactomes in repaired organoid podocytes.**

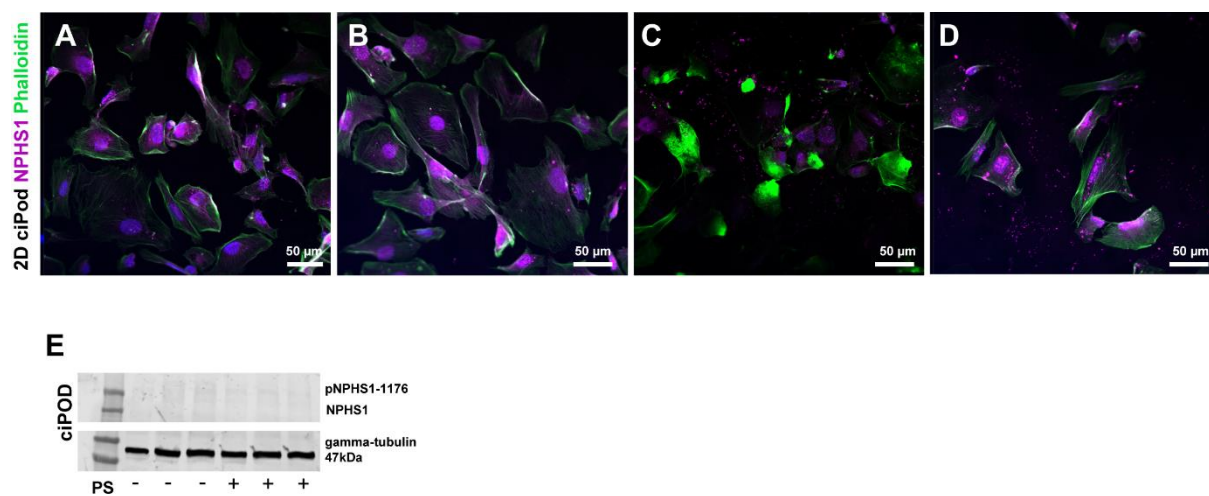

**Fig. S7. Related to figure 5. Podocyte cytoskeleton analysis and slit diaphragm activation measurements in ciPODs following protamine sulfate treatment.** (A-D) Phalloidin (green), NPHS1 (magenta)) of protamine sulfate treated and heparin rescued ciPODs. (E) pNPHS1 and NPHS1 protein expression analysis of protamine sulfate treated ciPODs. Gamma tubulin was used as a reference protein.

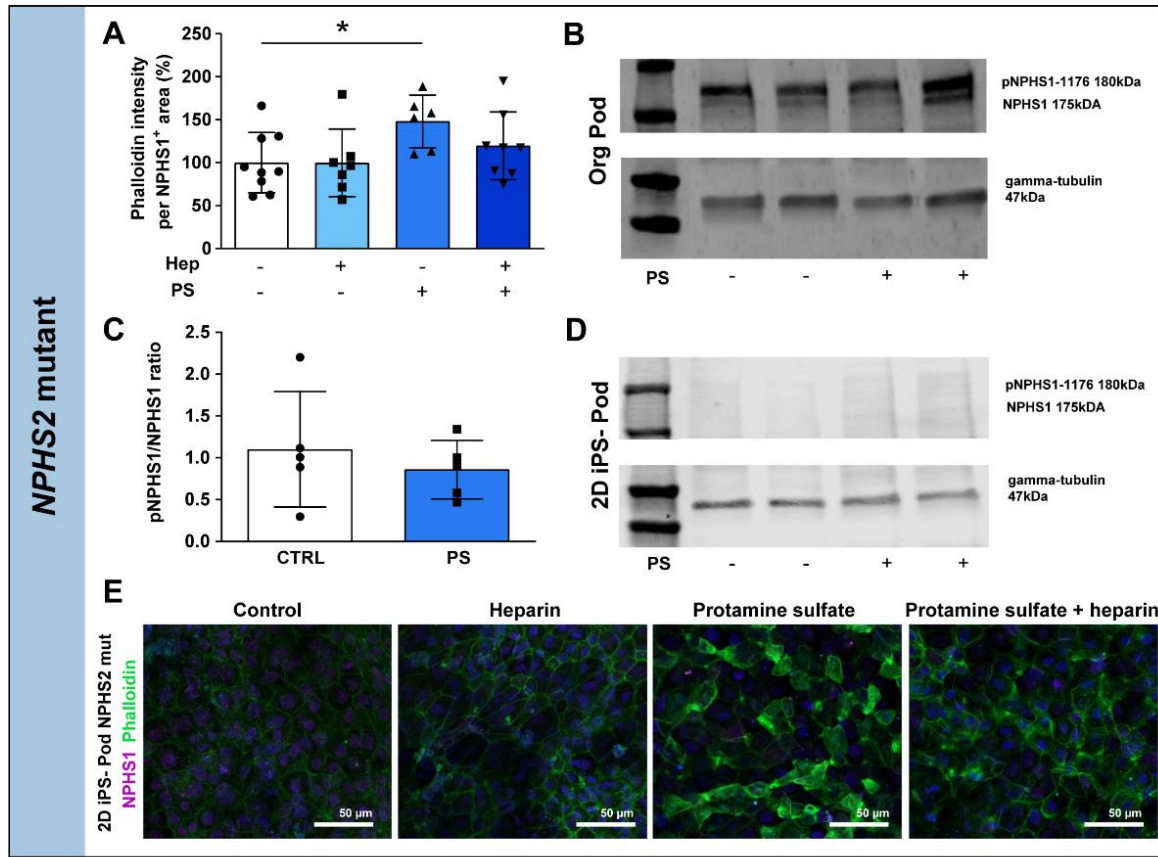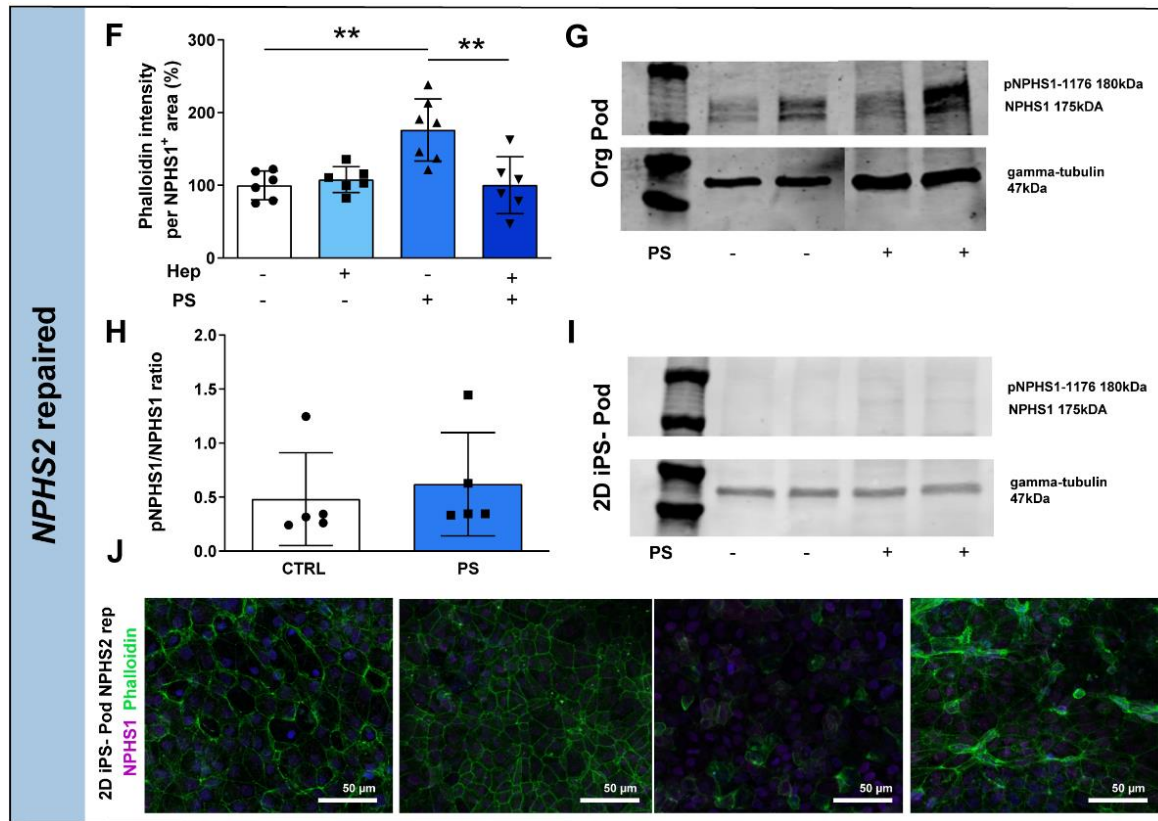

**Fig. S8. Related to figure 5. Podocyte cytoskeleton analysis and slit diaphragm activation measurements in mutant and repaired kidney organoids.** Quantification of phalloidin intensity in protamine sulfate-treated and heparin-rescued podocytes in (A) mutant and (F) repaired kidney organoids. \*= $p<0.05$ , \*\* =  $p<0.01$ , using one-way ANOVA analysis followed by Tukey post-test. Data are presented as mean  $\pm$  SD from three independent experiments using at least two biological replicates per conditions. pNPHS1 and NPHS1 protein expression analysis of protamine sulfate-treated (B) mutant and (G) repaired kidney organoids. Western blotting quantification pNPHS1/NPHS1 ratio of protamine sulfate-treated (C) mutant and (H) repaired kidney organoids. Data are presented as mean  $\pm$  SD from three independent experiments using at least two biological replicates per conditions. pNPHS1 and NPHS1 protein expression analysis of protamine sulfate-treated 2D (D) mutant and (I) repaired iPSC-derived podocytes. Gamma tubulin was used as a reference protein. Podocyte cytoskeleton analysis (phalloidin (green)) in (E) mutant and (J) repaired 2D iPSC-derived podocytes (NPHS1 (magenta)) following protamine sulfate treatment and heparin rescue.

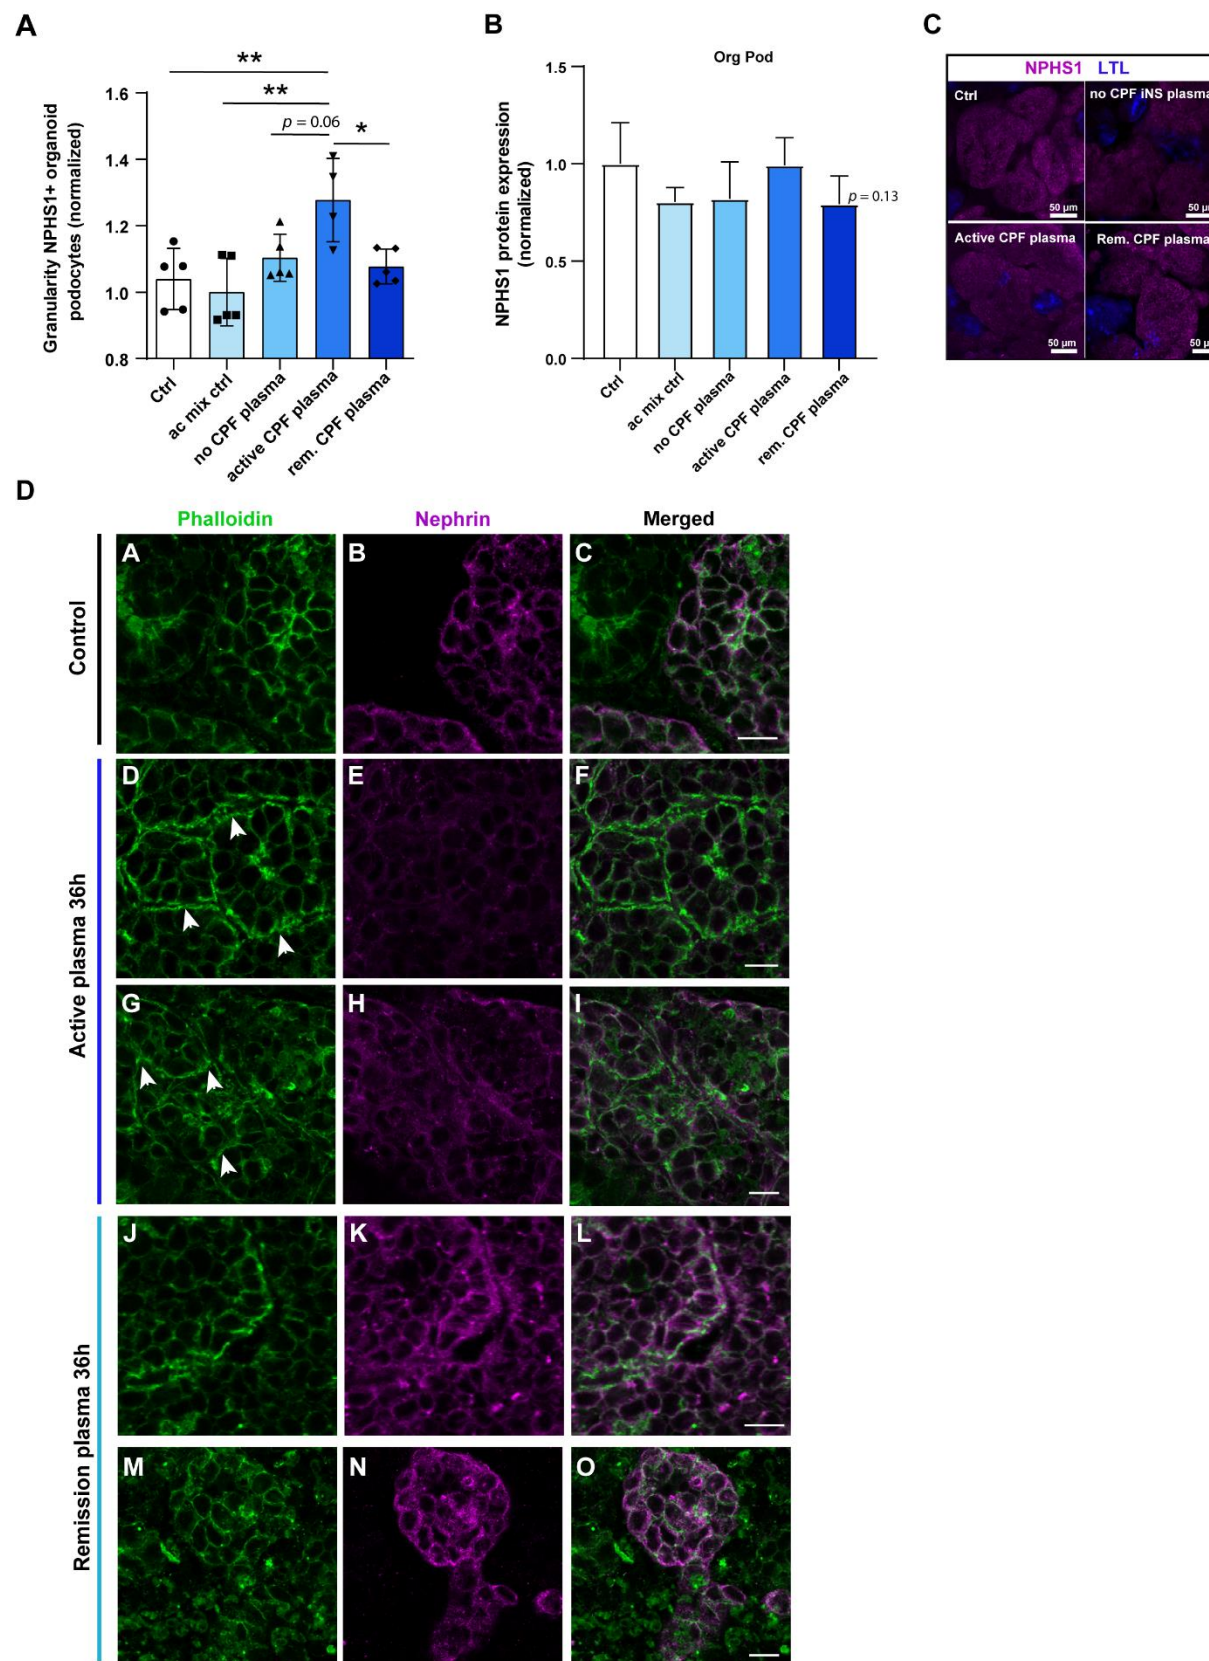

**Fig. S9. Podocyte injury analysis following CPF-containing and -free plasma after 4h and 36h.** (A) Cytoplasmic granularity analysis in NPHS1-sorted organoid podocytes, isolated from kidney organoids treated with 10% (v/v) iNS plasmapheresis plasma (circulating permeability factor (CPF) free, active CPF and remission CPF plasma), control (E6 medium) and anti-coagulation mix (ac mix ctrl) for 4h (N=2 independent experiments, biological triplicates per condition).  $*=p<0.05$ ,  $**=p<0.01$ , using one-way ANOVA analysis followed by Tukey post-test. Data are presented as mean  $\pm$  SD. (B) Flow cytometry analysis of NPHS1 expression in organoid podocytes (Org Pod) treated with 10% (v/v) active and remission CPF plasma, CPF-free plasma, anticoagulation control (Ac mix ctrl) and E6 medium control (Control) for 4h. Data are presented as mean  $\pm$  SD. (C) NPHS1 (magenta) and LTL (blue) expression following 4h plasma treatments in kidney organoids. (D) Podocyte cytoskeleton analysis following CPF-containing (active) and -free (remission) plasma after 36h exposure. Arrowheads indicate actin condensation at the podocyte basement membrane. Scale bars 10 microns.



**Table S1.** Top 20 differentially expressed (DE) genes based on adjusted p-value

|    | PT/LH/DT | Podocyte precursor | Podocyte subcluster 1 | Podocyte subcluster 2 | Podocyte subcluster 3 | Loop progenitor | DT/CD     | EC precursor | Mesengial precursor | Stroma 1 | Stroma 2 | Stroma 3  | Stroma 4 | Stroma 5 | Stroma/neural progenitor | Stroma/neuron | Neuron/glia |
|----|----------|--------------------|-----------------------|-----------------------|-----------------------|-----------------|-----------|--------------|---------------------|----------|----------|-----------|----------|----------|--------------------------|---------------|-------------|
| 1  | IRX1     | WT1                | NPHS2                 | CLIC5                 | ITGA3                 | KIF20A          | LBX1      | CD34         | GATA3               | CTSC     | CD24     | ADCYA P1  | ISL1     | MEOX2    | CD81                     | CLSPN         | ZIC2        |
| 2  | IRX2     | MAFB               | SOST                  | PTPRO                 | PTPRO                 | DLGAP5          | PITX2     | PLVAP        | NEFM                | COL3A1   | ALX4     | CYTL1     | OSR2     | DLX2     | COL3A1                   | XRCC2         | SOX2        |
| 3  | MAB21L2  | GADD45A            | TCF21                 | SOST                  | PODXL                 | CENPA           | POU4F1    | EBF3         | ANGPT1              | SULT1 E1 | PRRX1    | CNTN3     | NEFM     | DLX1     | COL1A2                   | TYMS          | PAX3        |
| 4  | RFLNA    | NPHS2              | PODXL                 | WT1                   | NPHS1                 | CENPE           | TMEM108   | VCAM1        | FLRT3               | CRABP1   | COL21 A1 | PRSS12    | SIM2     | RALYL    | MT-ND1                   | UHRF1         | RFX4        |
| 5  | CLDN11   | MDK                | PTPRO                 | SBSPON                | PLA2R1                | KNL1            | GATA3     | CRABP1       | VCAN                | CHST2    | NOVA1    | TAC1      | ZNF385 D | PALMD    | HNF1B                    | CENPU         | CACNG8      |
| 6  | MECOM    | MT-CO2             | CLIC5                 | PODXL                 | ENPEP                 | CDC20           | GRIA4     | IFITM3       | FN1                 | NAV3     | CXCL1 4  | VEGFC     | HAND2    | FSTL5    | LAPTM4A                  | DTL           | POU3F2      |
| 7  | CXCL12   | MARCKS             | WT1                   | NPHS2                 | ST3GAL6               | GTSE1           | MYF6      | COL12A1      | PDGFC               | STMN2    | MAB21 L2 | CRABP1    | SLC26A 7 | MGP      | SFRP2                    | FAM111B       | ZIC5        |
| 8  | PTN      | FTH1               | DDN                   | NPHS1                 | NPHS2                 | HMMR            | LYPD1     | COL6A3       | PTH1R               | S100A 10 | MAB21 L1 | MEIS2     | CHRM2    | TNMD     | HSP90B1                  | ORC6          | CHL1        |
| 9  | SIX2     | MT-ATP6            | AQP3                  | AQP3                  | AC008264.2            | TACC3           | CAMK2N 1  | LAMA4        | FHL1                | NDST3    | ALDH1 A2 | TMSB4X    | TTN      | IFI44L   | GAS1                     | RAD51AP1      | SMOC1       |
| 10 | USH1C    | KCNQ1OT1           | ENPEP                 | TCF21                 | CLIC5                 | PLK1            | GATA3-AS1 | CD99         | AC060834.2          | PENK     | POSTN    | FAT4      | GUCY1 A1 | HPGD     | FBLN1                    | MYBL2         | MSX1        |
| 11 | COL2A1   | MT-CO3             | SBSPON                | DDN                   | SPOCK2                | NUF2            | OLFML2 B  | PCOLCE       | TNMD                | MEIS2    | ALX1     | CDH2      | CPE      | TRPS1    | PDGFRA                   | PCLAF         | PHYHIPL     |
| 12 | COL9A2   | SOX4               | PLA2R1                | VAMP8                 | SBSPON                | ASPM            | PDGFC     | HMGA2        | MEOX2               | BCHE     | CSR2     | MIR137 HG | NRP2     | MKX      | MT-CYB                   | GINS2         | PI15        |
| 13 | EGFL6    | MT-ND4             | ST3GAL6               | ST3GAL6               | SOST                  | CCNB2           | LIN7A     | USH1C        | TMSB4X              | ACKR3    | LVRN     | SPOCK 3   | TBX2     | COL11 A1 | CPE                      | ATAD5         | MAP6        |
| 14 | ERG      | MT-ND1             | SPOCK2                | ENPEP                 | VEGFA                 | CKAP2L          | SNCA      | DDR2         | FAM110B             | TPM1     | FAM19 6A | USH1C     | SORCS 1  | FIBIN    | MT-CO3                   | E2F1          | LMX1A       |
| 15 | PLD5     | MT-CO1             | VAMP8                 | MPP5                  | WT1                   | KIF4A           | FLRT3     | BTBD3        | BCHE                | TWIST 1  | LUM      | RPL3      | CCDC1 41 | CSMD3    | MDK                      | MCM10         | TFAP2B      |
| 16 | TSPAN13  | CRABP1             | CLDN5                 | CLDN5                 | PRODH2                | TROAP           | SHISA2    | SERPINH 1    | MDK                 | COL6A 3  | PRRX2    | RPL10     | NRXN1    | C3orf80  | CALR                     | CDC45         | GDF7        |
| 17 | MIA      | ANXA1              | NPHS1                 | SPOCK2                | MPP5                  | TOP2A           | PTPRZ1    | ROBO2        | NR2F1               | KLHL4    | SOX11    | RPL13     | IGFBP3   | RGCC     | MT-ATP6                  | CENPK         | RAB3C       |
| 18 | CYP1B1   | AIF1               | MRGPRF                | ARHGAP29              | PTPRQ                 | MKI67           | EGFLAM    | TPM1         | KIF26B              | PARM1    | TBX3     | HGF       | COL21 A1 | THBS4    | IL11RA                   | CDC6          | SATB2       |
| 19 | SOX5     | TPM2               | STON2                 | PLA2R1                | PLTP                  | KIF2C           | CRABP1    | CHST2        | ADAMTS6             | SLIT2    | PCDH9    | RPL10A    | SIM1     | RUNX1 T1 | FSTL1                    | MCM4          | TTYH1       |
| 20 | FAT3     | COL3A1             | TPPP3                 | GADD45A               | MAGI2                 | BIRC5           | ADAMTS 6  | EDNRA        | CREB5               | MAB21 L2 | PCDH1 0  | RPL30     | PDZRN 3  | PTGFR    | APP                      | FANCD2        | WSCD2       |

PT: proximal tubule, LH: loop of Henle, DT: distal tubule, CD: collecting duct, EC: endothelial cells.

**Table S2.** Antibodies used for immunofluorescence staining.

| Primary antibody                                                             | Secondary antibody                                               |
|------------------------------------------------------------------------------|------------------------------------------------------------------|
| Human Nephrin Antibody (AF4269, R&D Systems)                                 | Donkey anti-sheep Alexa Fluor™ 647 (A21448, Thermo Fisher)       |
| Anti-Podocin antibody (P0372, Sigma Aldrich)                                 | Donkey anti-rabbit Alexa Fluor™ 568 (A10042, Thermo Fisher)      |
| Anti-Human WT1 clone 6F-H2 (M3561, Dako)                                     | Donkey anti-mouse Alexa Fluor™ 488 (A21202, Thermo Fisher)       |
| Anti-synaptopodin antibody (65194, Progen)                                   | Donkey anti-mouse Alexa Fluor™ 488 (A21202, Thermo Fisher)       |
| Monoclonal Anti-PLA2R antibody (AMAB90772, Sigma Aldrich)                    | Donkey anti-mouse Alexa Fluor™ 488 (A21202, Thermo Fisher)       |
| Human CD31/PECAM-1 Antibody (BBA7, R&D Systems)                              | Donkey anti-mouse Alexa Fluor™ 488 (A21202, Thermo Fisher)       |
| PV-1 (PLVAP) antibody (HPA002279, Sigma-Aldrich)                             | Donkey anti-rabbit Alexa Fluor™ 568 (A10042, Thermo Fisher)      |
| VE-cadherin (F-8) AC (sc-9989 AC, Santa Cruz Biotechnology)                  | Donkey anti-mouse Alexa Fluor™ 647 (A31571, Thermo Fisher)       |
| Lotus Tetragonolobus Lectin (LTL) biotinylated (B-1325, Vector Laboratories) | Streptavidin, Alexa Fluor™ 405 conjugate (S32351, Thermo Fisher) |
| Anti-E-Cadherin clone 36 (610181, BD Biosciences)                            | Donkey anti-mouse Alexa Fluor™ 488 (A21202, Thermo Fisher)       |
| GATA-3 (D13C9) monoclonal Antibody (5852, Cell Signaling)                    | Donkey anti-rabbit Alexa Fluor™ 647 (A31573, Thermo Fisher)      |
| Flash Phalloidin™ Green 488 (424201, Biolegend)                              | n.a.                                                             |
| Anti-EHD3 antibody (HPA049890, Sigma-Aldrich)                                | Donkey anti-rabbit Alexa Fluor™ 568 (A10042, Thermo Fisher)      |

**Table S3.** Antibodies used for western blotting.

| <b>Primary antibody</b>                                         | <b>Secondary antibody</b>                                   |
|-----------------------------------------------------------------|-------------------------------------------------------------|
| Anti-Nephrin (phosphor Y1176 + Y1193) Antibody (ab80299, Abcam) | Goat anti-rabbit, Alexa Fluor™ 680 (A-21076, Thermo Fisher) |
| Anti-Nephrin antibody (sc-19000, Santa Cruz)                    | Donkey anti-goat, Alexa Fluor™ 680 (A-21084, Thermo Fisher) |
| Anti- $\gamma$ -Tubulin antibody (T6557, Sigma)                 | Donkey anti-mouse, DyLight 800 (SA5-10172, Thermo Fisher)   |

**Table S4.** iPS-NPHS2 mutant CRISPR sequencing data

|                                                                                                                                                                                                                                                                                                                                                                                                                                                                                                                                                                                                                                                                                                                                                                                                                                                                                                                                                                                                                                                                                                                                                                                                                                                                    |
|--------------------------------------------------------------------------------------------------------------------------------------------------------------------------------------------------------------------------------------------------------------------------------------------------------------------------------------------------------------------------------------------------------------------------------------------------------------------------------------------------------------------------------------------------------------------------------------------------------------------------------------------------------------------------------------------------------------------------------------------------------------------------------------------------------------------------------------------------------------------------------------------------------------------------------------------------------------------------------------------------------------------------------------------------------------------------------------------------------------------------------------------------------------------------------------------------------------------------------------------------------------------|
| <p><b>Sequencing data before CRISPR repair (NPHS2 exon 3):</b></p> <p>ATCTAGAAAAAAAAAATCCAATTGAATCATTTTGAAGCAGCCTCAGAAGAAATTGCACTCTGA<br/> AACAAAACATCACAAGTGGTATTAATAATACTCCCTCTTTCCATTAAATAGCTAATGAGCAATA<br/> CATATAAAGCTAGTGCAGAACTCACAGTAAAATATAAGATTTAATATGCCTTGATAAGATTAA<br/> TTTAGGGAAAGTTGGCCATGGATTTTAGATAATCATAAGTCTTTAATCAAAATTCTGTCTATGGG<br/> TTCAAAAATTAACATGGTTAATACTTTTTTCATTTCTGAAATTTTACACTTACTAAATATAGATT<br/> TTGGAACTTAAGTATTAATAGAAATTTTTTCCTGGTTCTCAAACAAAAAATTTCTGATATCTA<br/> GGATCATTCTTATGCCAAGGCCTTTTGAAGACTTTTTCTTTCTGGGAGTGATTTGAAAGGATTAA<br/> ATTTCTCTTATAGTTGTACAAGAGTATGAA<b>AGAGTATTATTC<b>CAACT</b>GGGACATCTGCTTCTGGA</b><br/> <b>AGAGCCAAAGGCCCTGGTAAAAAACACTCTTTTTTTCTAAACACCTCTCTCCTGACTTGCCAATTTT</b><br/> <b>TTCAACCCATGCAGATTTGTAATATGGACCTCAGATTAATGAAGTAACTTGATTCATGATATCT</b><br/> <b>GAATTTTCCAATCTGTTACTTATAGGTTATTCAAATATTCTTCAGAGACTATTACTACTAGGTCAT</b><br/> <b>AGGTAGCCAAGAGAGAGAATTGGTACAGAGAGCCACATGCCAGGGCAAGGCTTGCTGGAATA</b><br/> <b>GCAAGTTAGCTTAGGACCAATGGCTGGGGACTGATTTGAGTACGATGTGTATATGGTCAGAGTC</b><br/> <b>CTGTGAATTCTCAGAGAAAAGCTGAGCTAGTCCCACTCCAGGTGCTCAGATCCAATCATGAGA</b><br/> <b>AACAGGCAAAGTTCAGCATTCAAATAACAAGTTGCTCTTCAGTTATAGGGATTTAAAAACATA</b><br/> <b>GATTAAGCATTCTTGTGGCTCA</b></p> |
| <p><b>Sequencing data after CRISPR repair (NPHS2 exon 3):</b></p> <p>ATCTAGAAAAAAAAAATCCAATTGAATCATTTTGAAGCAGCCTCAGAAGAAATTGCACTCTGA<br/> AACAAAACATCACAAGTGGTATTAATAATACTCCCTCTTTCCATTAAATAGCTAATGAGCAATA<br/> CATATAAAGCTAGTGCAGAACTCACAGTAAAATATAAGATTTAATATGCCTTGATAAGATTAA<br/> TTTAGGGAAAGTTGGCCATGGATTTTAGATAATCATAAGTCTTTAATCAAAATTCTGTCTATGGG<br/> TTCAAAAATTAACATGGTTAATACTTTTTTCATTTCTGAAATTTTACACTTACTAAATATAGATT<br/> TTGGAACTTAAGTATTAATAGAAATTTTTTCCTGGTTCTCAAACAAAAAATTTCTGATATCTA<br/> GGATCATTCTTATGCCAAGGCCTTTTGAAGACTTTTTCTTTCTGGGAGTGATTTGAAAGGATTAA<br/> ATTTCTCTTATAGTTGTACAAGAGTATGAA<b>AGGGTATTATTC<b>CGACT</b>GGGACATCTGCTTCTGGA</b><br/> <b>AGAGCCAAAGGCCCTGGTAAAAAACACTCTTTTTTTCTAAACACCTCTCTCCTGACTTGCCAATTTT</b><br/> <b>TTCAACCCATGCAGATTTGTAATATGGACCTCAGATTAATGAAGTAACTTGATTCATGATATCT</b><br/> <b>GAATTTTCCAATCTGTTACTTATAGGTTATTCAAATATTCTTCAGAGACTATTACTACTAGGTCAT</b><br/> <b>AGGTAGCCAAGAGAGAGAATTGGTACAGAGAGCCACATGCCAGGGCAAGGCTTGCTGGAATA</b><br/> <b>GCAAGTTAGCTTAGGACCAATGGCTGGGGACTGATTTGAGTACGATGTGTATATGGTCAGAGTC</b><br/> <b>CTGTGAATTCTCAGAGAAAAGCTGAGCTAGTCCCACTCCAGGTGCTCAGATCCAATCATGAGA</b><br/> <b>AACAGGCAAAGTTCAGCATTCAAATAACAAGTTGCTCTTCAGTTATAGGGATTTAAAAACATA</b><br/> <b>GATTAAGCATTCTTGTGGCTCA</b></p>  |

RED = sgRNA, *Cursive* = Homology Directed Repair (HDR) template, **BOLD** = mutation (edit)

The HDR Template contains silent mutations in the protospacer adjacent motif (PAM) region in order to prevent re-cutting after successful editing.

Original sequence:

CAAGAGTATGAAAG**AGT**AATTATATTCCA**ACT**GGGACATCTGCTTCTGGAAGAGCCAAAGGCCCT  
GGTAAAAAACACTCTTTTTTTTCTAAACAC

Sequence after successful editing and incorporation of silent mutations:

CAAGAGTATGAAAG**GGT**AATTATATTCC**GACT**GGGACATCTGCTTCTGGAAGAGCCAAAGGCCCT  
GGTAAAAAACACTCTTTTTTTTCTAAACAC

**Table S5.** Reagent and resource table

[Click here to download Table S5](#)

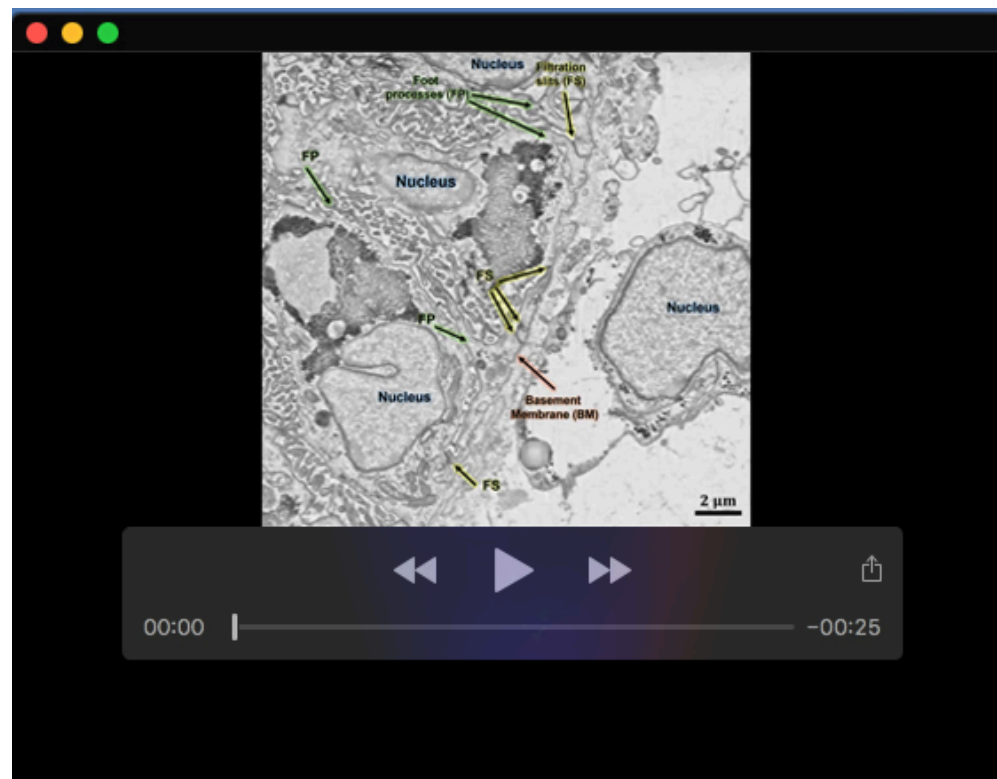

**Movie 1. Related to figure 6.** FIB-SEM volume imaging of the vehicle-treated organoid podocytes showing segmented podocyte cell bodies, foot processes and annotated filtration slits.

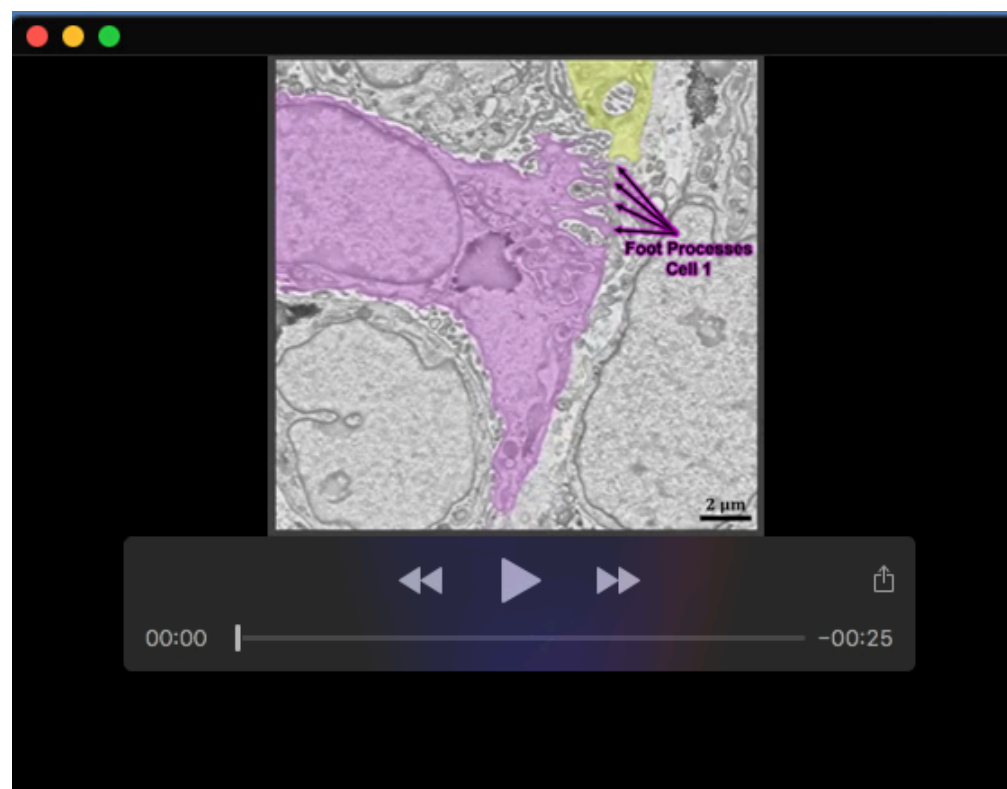

**Movie 2. Related to figure 6.** 3D rendering following FIB-SEM volume imaging and segmentation of the vehicle-treated organoid podocytes showing interdigitating foot processes.

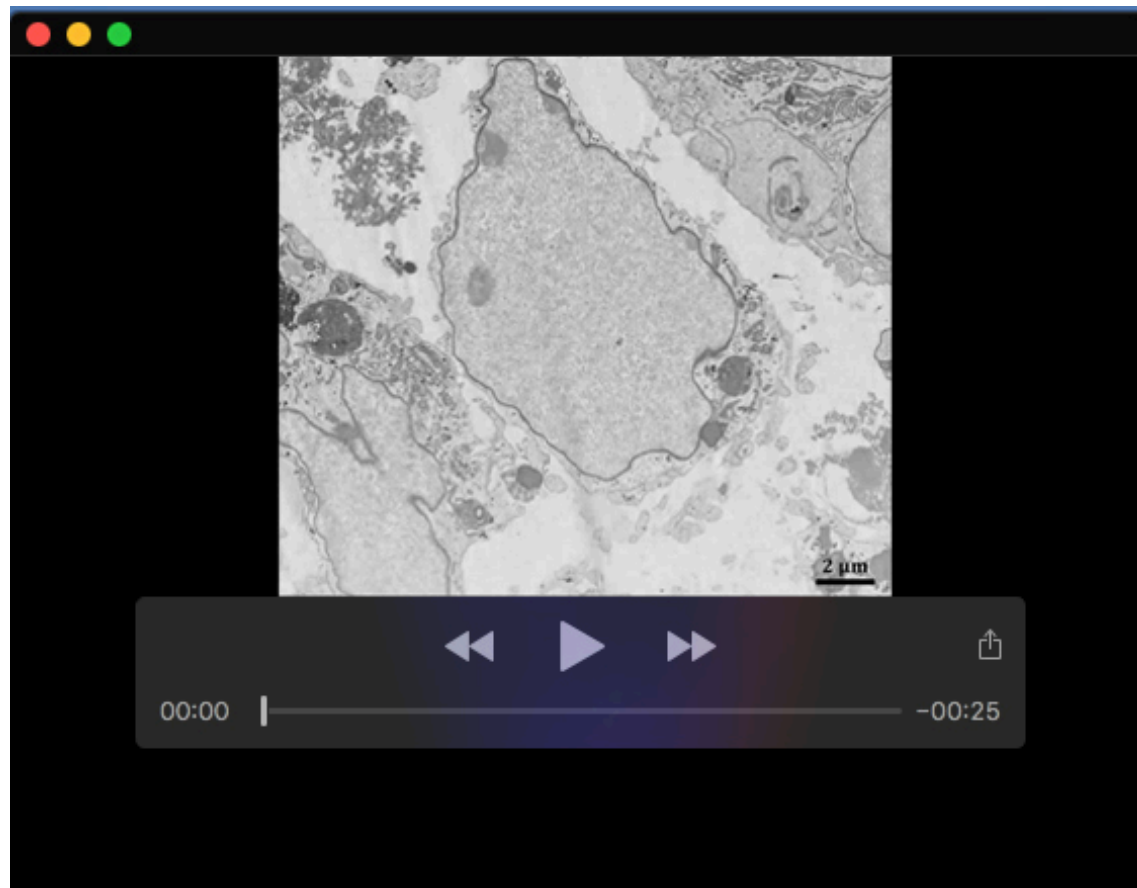

**Movie 3.** Related to figure 6. FIB-SEM volume imaging of the PAN-treated organoids showing injured podocytes.
